# Supplementary material for: Olfactory receptors contribute to progression of kidney fibrosis
Source: PubMed Central journal article supplement (PMC8857310; doi:10.1038/s41540-022-00217-w), 2022-02-18
Supplement: 41540_2022_217_MOESM1_ESM.pdf [file 41540_2022_217_MOESM1_ESM.pdf]

## Supplementary Information

### Olfactory receptors contribute to progression of kidney fibrosis

Ali Motahharynia<sup>1</sup>, Shiva Moein<sup>1\*</sup>, Farnoush Kiyanpour<sup>1</sup>, Kobra Moradzadeh<sup>1</sup>, Moein Yaqubi<sup>2</sup>,  
Yousof Gheisari<sup>1,3</sup>

1. Regenerative Medicine Research Center, Isfahan University of Medical Sciences, Isfahan, Iran

2. Department of Neurology and Neurosurgery, Montreal Neurological Institute and Hospital,  
McGill University, Montreal, Canada

3. Department of Genetics and Molecular Biology, Isfahan University of Medical Sciences,  
Isfahan, Iran

\* Corresponding Author:

Shiva Moein, Ph.D. Regenerative Medicine Research Center, Isfahan University of Medical  
Sciences, Isfahan, 8174673461, Iran Tel/Fax: +98-3136687087.

Email: shiva.moein@res.mui.ac.ir

ORCID: 0000-0002-6019-9504

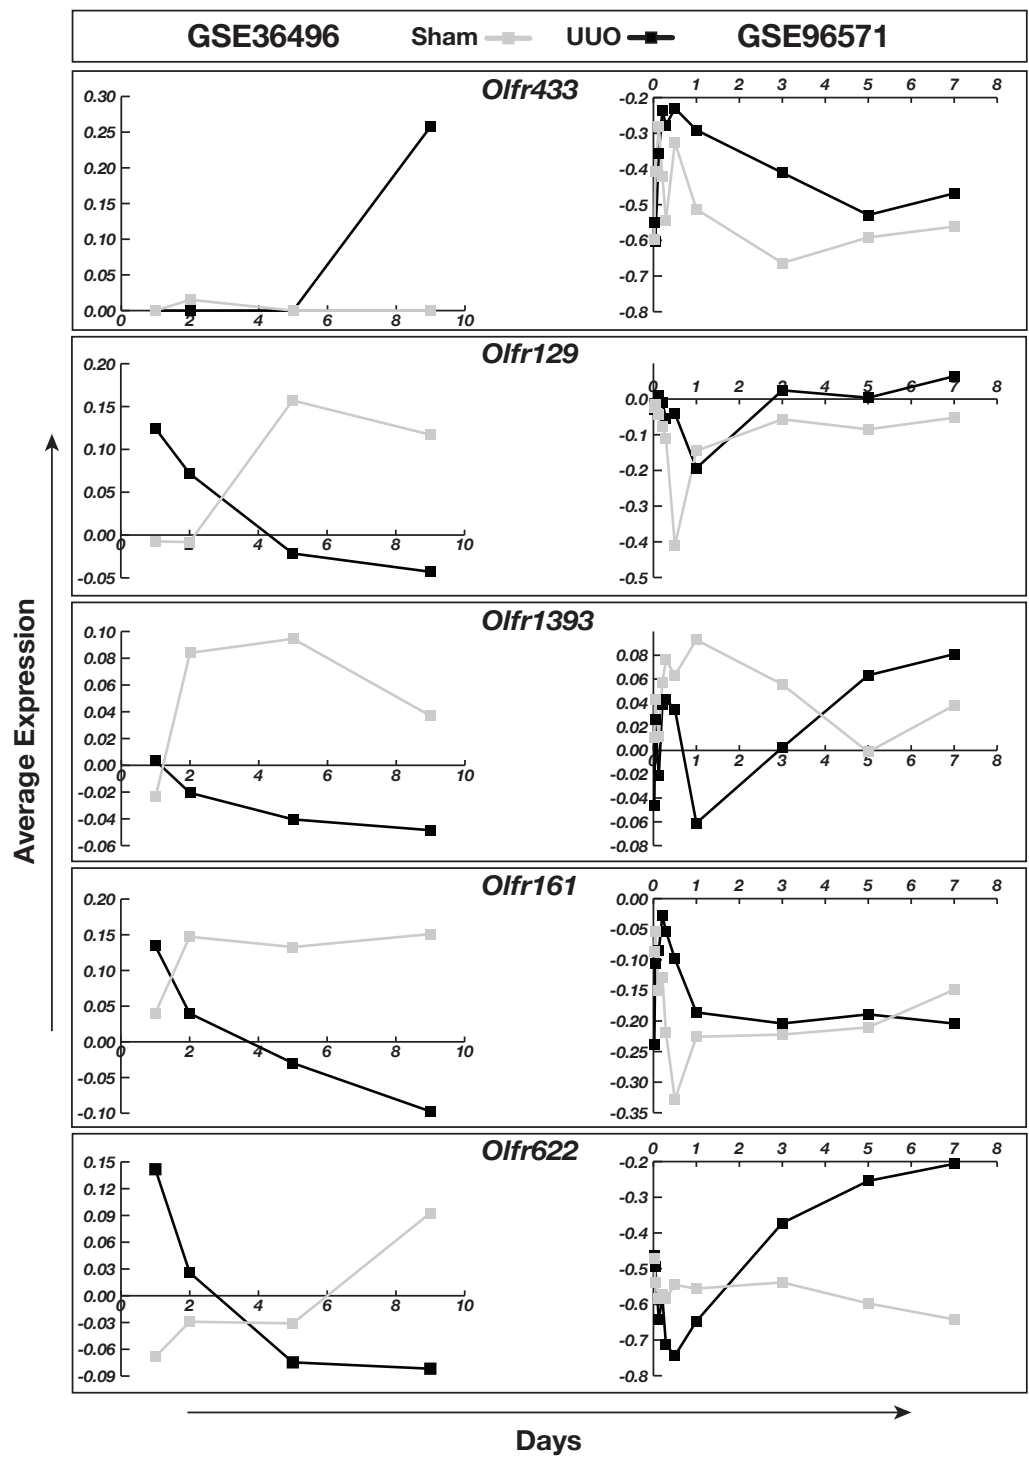

**Supplementary Figure 1. Expression patterns of common ORs between GSE36496 and GSE96571 datasets.** The expression patterns of common ORs (*Olf433*, *Olf129*, *Olf1393*, *Olf161*, and *Olf622*) between GSE36496 and GSE96571 datasets. The right and left sides represent the expression patterns of ORs in GSE36496 and GSE96571 datasets, respectively.

| Gene             | Sham (FC) | UUO (FC) | Result          |
|------------------|-----------|----------|-----------------|
| <i>Cebpb</i>     | 0.582     | 3.462 *  | Up-regulation   |
| <i>Hnf4a</i>     | 0.612     | 0.213 *  | Down-regulation |
| <i>Serpina3n</i> | 0.705 *   | 19.549 * | Up-regulation   |
| <i>Tgfb1</i>     | 0.763 *   | 4.464 *  | Up-regulation   |

**Supplementary Table 1. Expression profile of selected genes confirms that our model recapitulates the findings of Wu et al. studies.** Expression of each gene is normalized to two housekeeping genes (*Hprt* and *Tfrc*) and is shown as fold change (FC).

\* P-value < 0.05

**Supplementary Data 1. PCR products sequencing of *Olf433*, *Olf161*, *Olf129*, *Olf622*, and *Olf1393*.** The results were uploaded in figshare repository<sup>1</sup>.

**Supplementary Data 2. Expression value of *Olf433*, *Olf161*, *Olf129*, *Olf622*, and *Olf1393* in mouse model of UUO over 21 days of treatment.** The Cycle of threshold (Ct) alongside the amplification of each read were uploaded in figshare repository<sup>2</sup>.

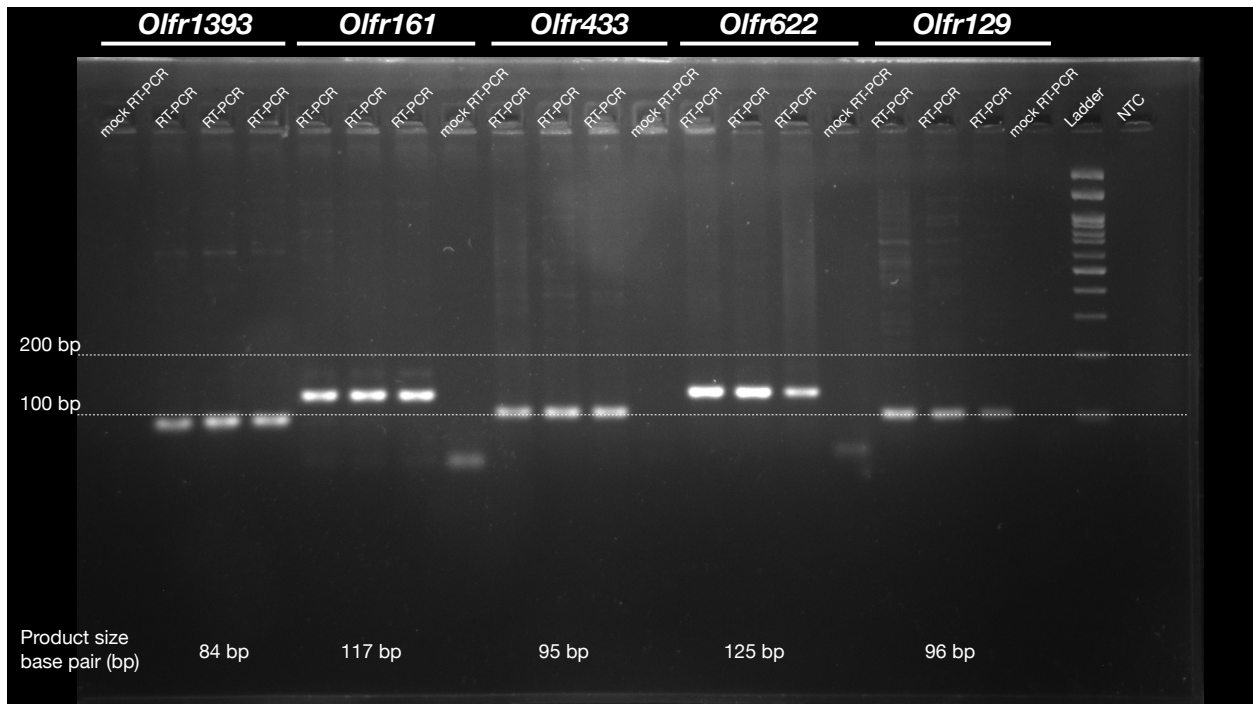

**Supplementary Figure 2. The gel-electrophoresis of RT-qPCR products alongside their mock reactions.** For each primer three different samples and mock reactions as well as non-template control (NTC) were loaded.

| Gene             | Gene ID | Forward primer           | Reverse primer           |
|------------------|---------|--------------------------|--------------------------|
| <i>Olf433</i>    | 258712  | CTCCGACCTCTTGCCTTCC      | CCTGAATCTGCCTGAACCAA     |
| <i>Olf129</i>    | 258324  | GGTATAACTGAGTGCTGCCTACTG | CCCACGATTCATTCGGGTGTAT   |
| <i>Olf1393</i>   | 258463  | CGTCCACTGCACTATACT       | GTTCAAGAAGCCTCCTACC      |
| <i>Olf161</i>    | 258859  | GTCTTGGGAAACCTGCTCATCAT  | AGTGGTGGAGGAGAAGCATAACAT |
| <i>Olf622</i>    | 259087  | CCTGGCTTGGAGAATGTTCACTGT | ATAGGCTGGTGGAGACTTGGCTC  |
| <i>Cebpb</i>     | 12608   | CAACCTGGAGACGCAGCACAAG   | GCTTGAACAAGTCCGCAGGGT    |
| <i>Hnf4a</i>     | 15378   | ACTCCTCTCCTGCTATGCCA     | GGGATGGTGACTCCTACCCT     |
| <i>Serpina3n</i> | 20716   | CAACCCTGAACATCGGGAGT     | TGCAGTCTACAGAGCTGAAACC   |
| <i>Tgfb1</i>     | 21803   | ATTCCTGGCGTTACCTTG       | GCTGATCCCGTTGATTTC       |
| <i>Hprt</i>      | 15452   | CGTCGTGATTAGCGATGATG     | AGTCTTTCAGTCCTGTCCATAA   |
| <i>Tfrc</i>      | 22042   | TGCATTGCGGACTGTAGAG      | CCCACCAAACAAGTTAGAGAAT   |

**Supplementary Table 2. The sequence of primers.**

**a**

**GSE119531**  
Normal samples

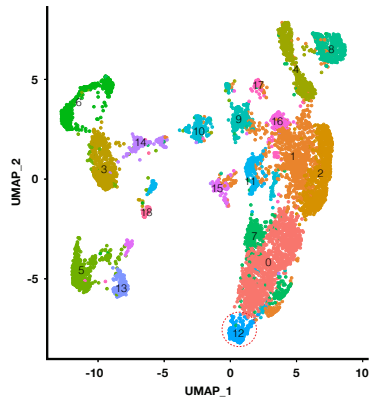

***Slc7a13***

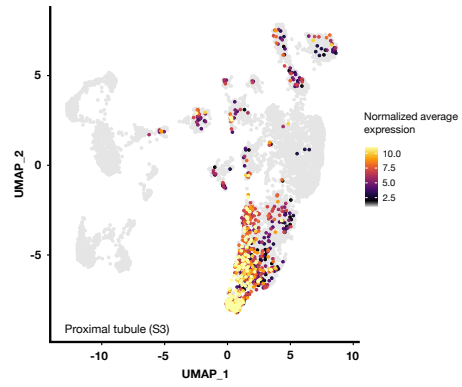

**b**

**GSE140023**  
UUO day-2

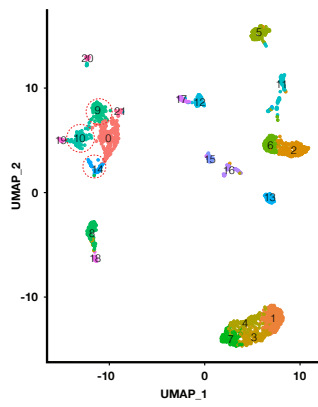

***Lyz2***

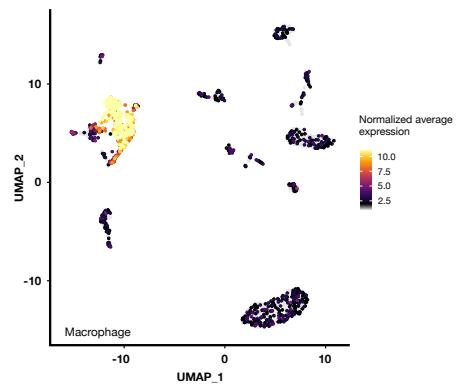

***CD74***

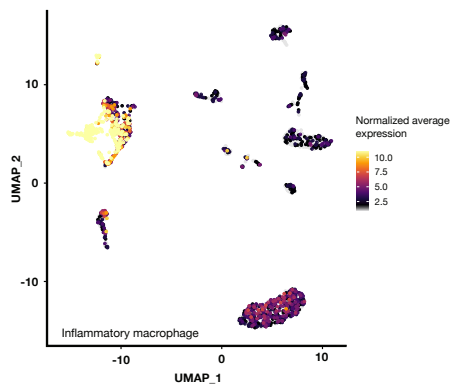

***Mki67***

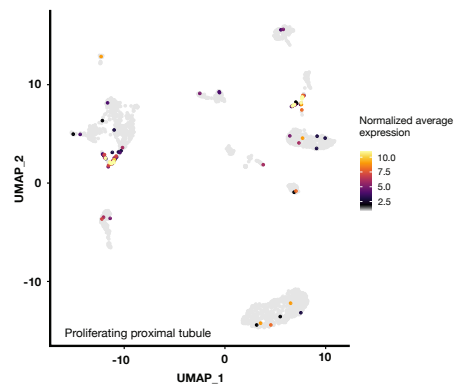

**c**

**GSE140023**  
UUO day-7

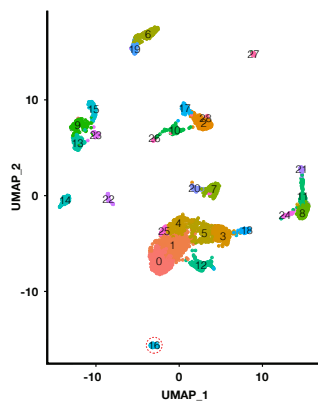

***Irf8***

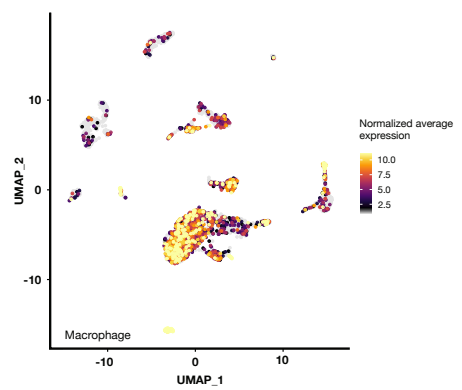

**Supplementary Figure 3. The expression of selected marker genes related to normal and UUO kidneys.** Expression of the proximal tubule third segment (S3) cell marker in normal kidney cells (GSE119531) along with its uniform manifold approximation and projection (UMAP) plot (a). Expression of macrophage, inflammatory macrophage, and proliferating proximal tubule cell marker in UUO day-2 and macrophage cell marker in UUO day-7 samples (GSE140023), with their related UMAP plots (b and c).



## References

1. Motahharynia, A. *et al.* Supplementary Data 1: PCR products sequence. *Figshare* (2021)  
doi:<https://doi.org/10.6084/m9.figshare.12753749.v11>.
2. Motahharynia, A. *et al.* Supplementary Data 2: RT-qPCR results. *Figshare* (2021)  
doi:<https://doi.org/10.6084/m9.figshare.16755340.v2>.
